# Supplementary material for: The Role of Neuropeptide Y in Adipocyte-Macrophage Crosstalk during High Fat Diet-Induced Adipose Inflammation and Liver Steatosis
Source: Biomedicines. 2021 Nov 22;9(11):1739. doi: 10.3390/biomedicines9111739 (PMC8615496; doi:10.3390/biomedicines9111739)
Supplement: Supplementary file 1 [file biomedicines-09-01739-s001.zip]

Archive with 4 entries (4 files):
- Figure S2A (Blot results).pdf
- S1-S4.pdf
- supplemental information.pdf
- Table S1.pdf
