# Supplementary material for: The Role of Neuropeptide Y in Adipocyte-Macrophage Crosstalk during High Fat Diet-Induced Adipose Inflammation and Liver Steatosis
Source: Biomedicines. 2021 Nov 22;9(11):1739. doi: 10.3390/biomedicines9111739 (PMC8615496; doi:10.3390/biomedicines9111739)
Supplement: Supplementary file 1 [file biomedicines-09-01739-s001.zip › Table S1.pdf]

**Table S1. Gene name, symbols, and primer sequences.**

| <b>Gene</b>                                                   |                  |                         |                         |
|---------------------------------------------------------------|------------------|-------------------------|-------------------------|
| <b>Gene Name</b>                                              | <b>Symbol</b>    | <b>Forward Primer</b>   | <b>Reverse Primer</b>   |
| <b>18s ribosomal RNA</b>                                      | 18S              | TTCTGGCCAACGGTCTAGACAAC | CCAGTGGTCTTGGTGTGCTGA   |
| <b>Acetyl-Coenzyme A carboxylase alpha</b>                    | Acaca            | TGGCAGACCACTATGTTCCA    | GTTCTGGGAGTTTCGGGTTC    |
| <b>Acyl-CoA oxidase 1</b>                                     | Acox1            | TTGGAAACCACTGCCACATA    | GCCAGGACTATCGCATGATT    |
| <b>Apolipoprotein B</b>                                       | Apob             | TTGGCAAACCTGCATAGCATCC  | TCAAATTGGGACTCTCCTTTAGC |
| <b>Adipose triglyceride lipase</b>                            | Atgl             | ACACCAGCATCCAGTTCAA     | GGTTCAGTAGGCCATTCTC     |
| <b>Chemokine ligand 2</b>                                     | Ccl2             | TTAAAAACCTGGATCGGAACCAA | GCATTAGCTTCAGATTACGGGT  |
| <b>CD36 molecule</b>                                          | Cd36             | TCCTCTGACATTGCAGGTCTATC | AAAGGCATTGGCTGGAAGAA    |
| <b>CD68 antigen</b>                                           | Cd68             | GCCCCAGTACAGTCTACCTGG   | AGAGATGAATTCTGCGCCAT    |
| <b>Carbohydrate responsive element binding protein alpha</b>  | ChREBP- $\alpha$ | CGACACTCACCCACCTCTTC    | TGTTCAAGCCGGATCTTGTC    |
| <b>Cell death-inducing DFFA-like factor alpha</b>             | Cidea            | ACAGAAATGGACACCGGGTAGT  | CGAAGGTGACTCTGGCTATTCC  |
| <b>Cytochrome C oxidase subunit 7a polypeptide 1</b>          | Cox7a1           | CAGCGTCATGGTCAGTCTGT    | AGAAAACCGTGTGGCAGAGA    |
| <b>Cytochrome C oxidase subunit 8b polypeptide</b>            | Cox8b            | GCGAAGTTCACAGTGGTTCC    | GAACCATGAAGCCAACGACT    |
| <b>Carnitine palmitoyltransferase 1a</b>                      | Cpt1a            | GTCAAGCCAGACGAAGAACA    | CGAGAAGACCTTGACCAATAG   |
| <b>Carnitine palmitoyltransferase 2</b>                       | Cpt2             | CAGTTCAGGAAGACAGAAGTG   | CGAAGTGTCTTCAGAAACCG    |
| <b>Cytochrome P450, family 4, subfamily a, polypeptide 14</b> | Cyp4a14          | TTCTTTCGCCTGCGGAATGC    | CACTCCATCTGTGTGCTCGTGA  |
| <b>Diacylglycerol O-acyltransferase 2</b>                     | Dgat2            | CCAGCACTACTTTGGCATAATGC | CCTCTAGGTATGTCTGATGCAGC |
| <b>Fatty acid synthase</b>                                    | Fasn             | AAGGCTGGGCTCTATGGATT    | GGAGTGAGGCTGGGTTGATA    |
| <b>Fatty acid transporter protein 2</b>                       | Fatp2            | GATGCCGTGTCCGTCTTTTAC   | GACTTCAGACCTCCACGACTC   |
| <b>Fatty acid transporter protein 5</b>                       | Fatp5            | CCAGTGTGCTGATTGTGGAT    | GGCCAAGGTAGAAGCAGTGA    |
| <b>glyceraldehyde-3-phosphate dehydrogenase</b>               | Gapdh            | ACTTTGTCAAGCTCATTTCC    | TGCAGCGAACTTTATTGATG    |
| <b>Interleukin 6</b>                                          | Il6              | TAGTCCTTCCTACCCCAATTTC  | TTGGTCCTTAGCCACTCCTTC   |
| <b>Lipase, hormone sensitive</b>                              | Lipe             | TCCTGGAACCTAAGTGACGCAAG | CAGACACACTCCTGCGCATAGAC |
| <b>Lipoprotein lipase</b>                                     | Lpl              | CTGCTGGCGTAGCAGGAAGT    | GCTGGAAAGTGCTCCATTG     |
| <b>Monoglyceride lipase</b>                                   | Magl             | TTTCTGGCATGGTCCTGATT    | ATTGAGCAGTTTGGCAGCA     |

|                                                                             |                 |                         |                       |
|-----------------------------------------------------------------------------|-----------------|-------------------------|-----------------------|
| <b>Neuropeptide Y</b>                                                       | Npy             | TATCTCTGCTCGTGTTTG      | GTTCTGGGGGCATTTCTG    |
| <b>Neuropeptide Y receptor Y1</b>                                           | Npy1r           | GTCCCTGCAGTGGCTTCTTC    | TGATTCGCTTGGTCTCACTG  |
| <b>Peroxisome proliferator-activated receptor gamma coactivator 1 alpha</b> | Pgc1 $\alpha$   | ATGTGTCGCCTTCTTGCTCT    | CGGTGTCTGTAGTGGCTTGA  |
| <b>Perilipin 1</b>                                                          | Plin1           | AGATCCCGGCTCTTCAATACC   | AGAACCTTGTCAGAGGTGCTT |
| <b>Peroxisome proliferator-activated receptor gamma 2</b>                   | Ppar $\gamma$ 2 | TGGGTGAAACTCTGGGAGAT    | GCTGGAGAAATCAACTGTGG  |
| <b>PR domain containing 16</b>                                              | Prdm16          | TCTTACTTCTCCGAGATCCGAAA | GATCTCAGGCCGTTTGTCCAT |
| <b>Tumor necrosis factor alpha</b>                                          | Tnf- $\alpha$   | CCCTCACACTCAGATCATCTTCT | GCTACGACGTGGGCTACAG   |
| <b>Uncoupling protein 1</b>                                                 | Ucp1            | CACTCAGGATTGGCCTCTACGAC | GCTCTGGGCTTGCATTCTGAC |

---



---
